# Supplementary material
Source: publisher figshare collection journal article supplement (https://frontiersin.figshare.com/ndownloader/files/30715088)
Supplement: Supplementary file 1 [file 30715088]

## Sheet: assay_summary_2020_08_03
plate	R.squared	Slope	Intercept	Efficiency
1	0.996462	-3.1792	38.6175	106.321
2	0.99601	-3.34016	39.4099	99.2447
3	0.996651	-3.38093	39.2944	97.5952
4	0.996387	-3.25785	39.2897	102.745
5	0.995395	-3.34924	39.8258	98.8725
6	0.991292	-3.23822	38.989	103.616
7	0.996799	-3.4744	39.4941	94.0079
8	0.995068	-3.4387	39.731	95.3472
9	0.997432	-3.52022	40.2386	92.3416
10	0.995819	-3.47053	40.1944	94.1512
11	0.99712	-3.2893	39.1945	101.38
12	0.994361	-3.37803	39.6962	97.7107
13	0.995446	-3.4451	39.9595	95.1046
14	0.996147	-3.32124	39.3807	100.029
15	0.994209	-3.20707	39.4221	105.027
16	0.983025	-3.39858	39.9333	96.8975
17	0.994012	-3.32659	39.3057	99.8057
18	0.991268	-3.30973	39.7925	100.511
19	0.989179	-3.38118	40.4331	97.5855
20	0.990262	-3.11734	38.6367	109.308
21	0.991657	-3.39508	40.1655	97.0353
